# Supplementary material for: What Is Accounting for the Rapid Decline in Cigarette Sales in Japan?
Source: MDPI journal article supplement (doi:10.3390/ijerph17103570), 2020-05-20

**Supplementary Figure 1. Joinplot analysis of tobacco products (billion sticks). \* indicates that the slope is significantly different from zero, alpha = 0.05.**

**Total (cigarettes + HTPs), 2011-2019**

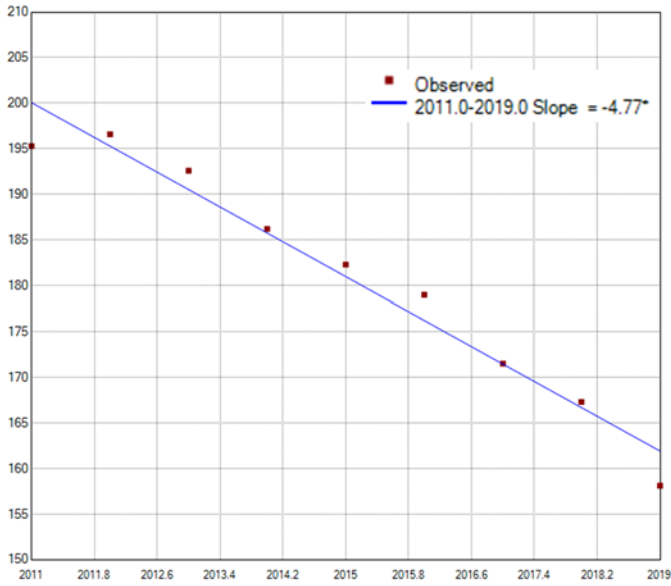

**Cigarettes only, 2011-2019**

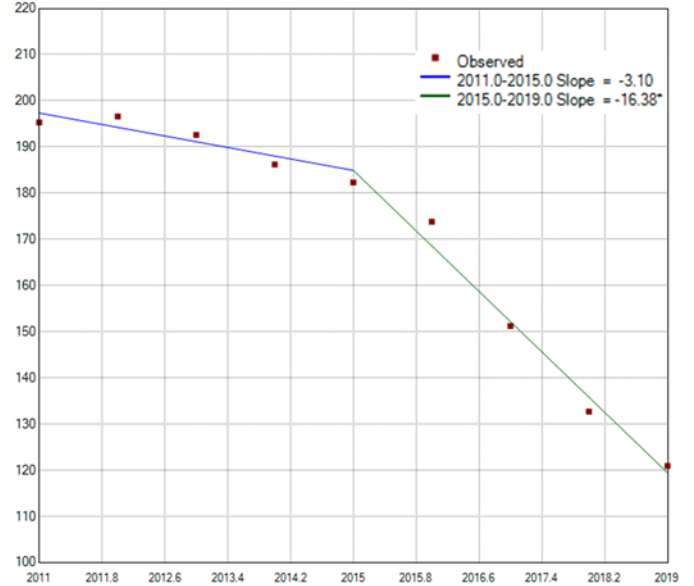

**Total (cigarettes + HTPs), 2016-2019**

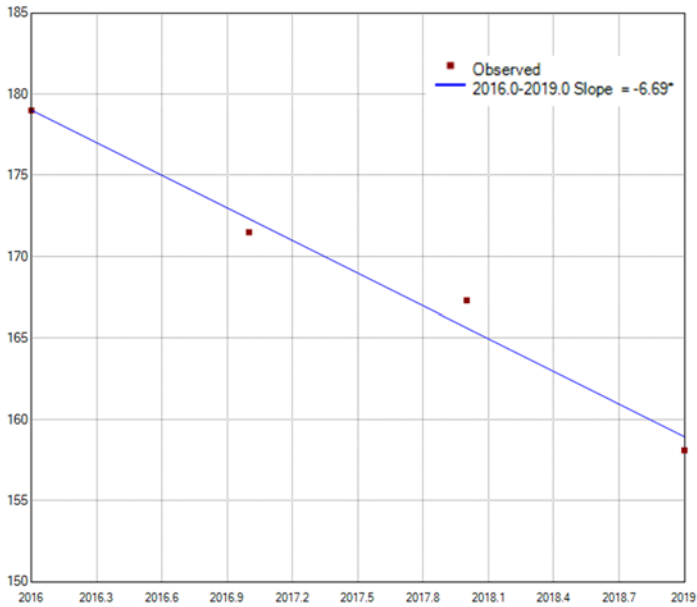

**Cigarettes only, 2016-2019**

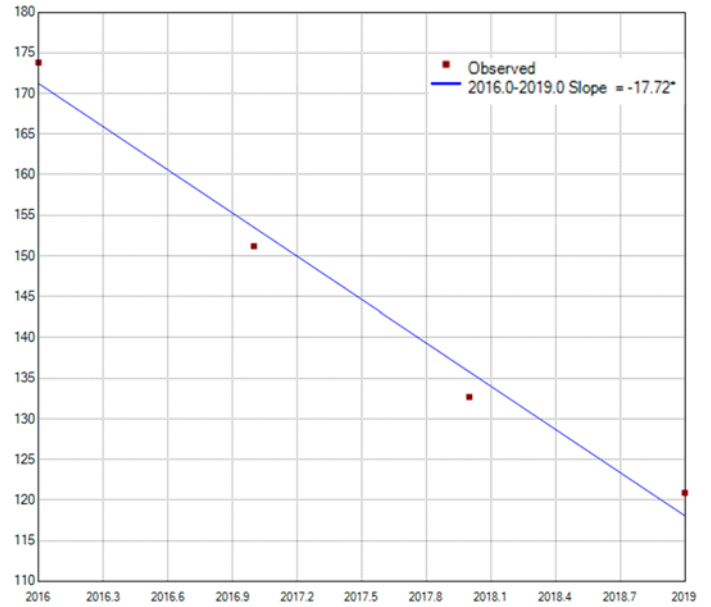

Supplement: s1 [file s1]
